# Supplementary material
Source: Elsevier journal article supplement (https://www.sciencedirect.com/science/article/pii/S2531043721002026)
Supplement: mmc1 [file S2531043721002026:mmc1.docx]

Digital Supplement to

**Epidemiology, Ventilation Management and Outcome in Patients Receiving Intensive Care after Non–thoracic Surgery – insights from the LAS VEGAS study**

Running title: Intraoperative versus Postoperative Ventilation

Fabienne D. Simonis, Sharon Einav,Ary Serpa Neto, Sabrine N. Hemmes, Paolo Pelosi, Marcelo Gama de Abreu, Marcus J. Schultz for the LAS VEGAS investigators. the PROVE Network investigators. and the Clinical Trial Network of the European Society of Anaesthesiology

**Supplementary Online Content**

Page 3. **eTable 1.** Characteristics of hospitals participating and not participating in ICU substudy

Page 4. **List of LAS VEGAS study Network Collaborators**

| **eTable 1.** Characteristics of hospitals participating and not participating in ICU substudy | | | | | |
| --- | --- | --- | --- | --- | --- |
|  | Non–participating hospitals  N = 29 | | Participating  hospitals  N = 117 | | P-value |
| Number of hospital beds | 464.5 | [243-638] | 650 | [438-1000] | 0.001 |
| Number of ICU beds | 12 | [8.2-22] | 22 | [12-37] | 0.029 |
| Number of operating rooms | 10 | [7-17] | 15 | [9-22] | 0.026 |
| Number of senior medical staff members anesthesiologists | 16.5 | [11-29] | 27 | [13-40] | 0.042 |
| Number of surgical procedures per week | 100 | [66-120] | 110 | [60-200] | 0.235 |
| Hospital type |  |  |  |  |  |
| Community hospital | 11 | [37.9] | 22 | [18.8] | 0.021 |
| Teaching hospital | 15 | [51.7] | 93 | [79.5] | 0.021 |
| Variables are expressed as median [interquartile range] or number [percentage]  ICU Intensive Care Unit | | | | | |

**List of LAS VEGAS study Network Collaborators**:

Austria

***LKH Graz, Graz:*** Wolfgang Kroell, Helfried Metzler, Gerd Struber, Thomas Wegscheider

***AKH Linz, Linz*:** Hans Gombotz

***Medical University Vienna*:** Michael Hiesmayr, Werner Schmid, Bernhard Urbanek

Belgium

***UCL - Cliniques Universitaires Saint Luc Brussels*:** David Kahn, Mona Momeni, Audrey Pospiech, Fernande Lois, Patrice Forget, Irina Grosu

***Universitary Hospital Brussels (UZ Brussel)*:** Jan Poelaert, Veerle van Mossevelde, Marie-Claire van Malderen

***Het Ziekenhuis Oost Limburg (ZOL), Genk*:** Dimitri Dylst, Jeroen van Melkebeek, Maud Beran

***Ghent University Hospital, Gent*:** Stefan de Hert, Luc De Baerdemaeker, Bjorn Heyse, Jurgen Van Limmen, Piet Wyffels, Tom Jacobs, Nathalie Roels, Ann De Bruyne

***Maria Middelares, Gent*:** Stijn van de Velde

***European Society of Anaesthesiology, Brussels:*** *Brigitte Leva, Sandrine Damster, Benoit Plichon*

Bosnia and Herzegovina

***General Hospital “prim Dr Abdulah Nakas” Sarajevo*:** Marina Juros-Zovko, Dejana  Djonoviċ- Omanoviċ

Croatia

***General Hospital Cakovec, Cakovec*:** Selma Pernar

***General Hospital Karlovac, Karlovac*:**Josip Zunic, Petar Miskovic, Antonio Zilic

***University Clinical Hospital Osijek, Osijek*:** Slavica Kvolik, Dubravka Ivic, Darija Azenic-Venzera, Sonja Skiljic, Hrvoje Vinkovic, Ivana Oputric

***University Hospital Rijeka, Rijeka*:** Kazimir Juricic, Vedran Frkovic

***General Hospital Dr J Bencevic, Slavonski Brod*:** Jasminka Kopic, Ivan Mirkovic

***University Hospital Center Split, Split*:** Nenad Karanovic, Mladen Carev, Natasa Dropulic

***University Hospital Merkur, Zagreb*:** Jadranka Pavicic Saric, Gorjana Erceg, Matea Bogdanovic Dvorscak

***University Hospital Sveti Duh, Zagreb*:** Branka Mazul-Sunko, Anna Marija Pavicic, Tanja Goranovic

***University Hospital, Medical school, “Sestre milosrdnice” (Sister of Charity), Zagreb*:** Branka Maldini, Tomislav Radocaj, Zeljka Gavranovic, Inga Mladic-Batinica, Mirna Sehovic

Czech Republic

***University Hospital Brno, Brno*:** Petr Stourac, Hana Harazim, Olga Smekalova, Martina Kosinova, Tomas Kolacek, Kamil Hudacek, Michal Drab

***University Hospital Hradec Kralove, Hradec Kralove*:** Jan Brujevic, Katerina Vitkova, Katerina Jirmanova

***University Hospital Ostrava, Ostrava*:** Ivana Volfova, Paula Dzurnakova, Katarina Liskova

***Nemocnice Znojmo, Znojmo*:** Radovan Dudas, Radek Filipsky

Egypt

***El Sahel Teaching hospital, Cairo*:** Samir el Kafrawy

***Kasr Al-Ainy Medical School, Cairo University*:** Hisham Hosny Abdelwahab, Tarek Metwally, Ahmed Abdel-Razek

***Beni Sueif University Hospital, Giza*:** Ahmed Mostafa El-Shaarawy, Wael Fathy Hasan, Ahmed Gouda Ahmed

***Fayoum University Hospital, Giza*:** Hany Yassin, Mohamed Magdy, Mahdy Abdelhady

***Suis medical Insurance Hospital, Suis*:** Mohamed Mahran

Estonia

***North Estonia Medical Center, Tallinn*:** Eiko Herodes, Peeter Kivik, Juri Oganjan, Annika Aun

***Tartu University Hospital, Tartu*:** Alar Sormus, Kaili Sarapuu, Merilin Mall, Juri Karjagin

France

***University Hospital of Clermont-Ferrand, Clermont-Ferrand*:** Emmanuel Futier, Antoine Petit, Adeline Gerard

***Institut Hospitalier Franco-Britannique, Levallois-Perret*:** Emmanuel Marret, Marc Solier

***Saint Eloi University Hospital, Montpellier*:** Samir Jaber, Albert Prades

Germany

***Fachkrankenhaus Coswig, Coswig*:** Jens Krassler, Simone Merzky

***University Hospital Carl Gustav Carus, Dresden*:** Marcel Gama de Abreu, Christopher Uhlig,

Thomas Kiss, Anette Bundy, Thomas Bluth, Andreas Gueldner, Peter Spieth, Martin Scharffenberg, Denny Tran Thiem, Thea Koch

***Duesseldorf University Hospital, Heinrich-Heine University*:** Tanja Treschan, Maximilian Schaefer,

Bea Bastin, Johann Geib, Martin Weiss, Peter Kienbaum, Benedikt Pannen

***Diakoniekrankenhaus Friederikenstift, Hannover*:** Andre Gottschalk, Mirja Konrad, Diana Westerheide, Ben Schwertfeger

***University of Leipzig, Leipzig*:** Hermann Wrigge, Philipp Simon, Andreas Reske, Christian Nestler

Greece

***“Alexandra” general hospital of Athens, Athens*:** Dimitrios Valsamidis, Konstantinos Stroumpoulis

***General air force hospital, Athens*:** Georgios Anthopoulos, Antonis Andreaou, Dimitris Karapanos

***Aretaieion University Hospital, Athens*:** Kassiani Theodorak, Georgios Gkiokas, Marios-Konstantinos Ttasoulis

***Attikon University Hospital, Athens*:** Tatiana Sidiropoulou, Foteini Zafeiropoulou, Panagiota Florou, Aggeliki Pandazi

***Ahepa University Hospital Thessaloniki, Thessaloniki*:** Georgia Tsaousig, Christos Nouris, Chryssa Pourzitaki,

Israel

***The Lady Davis Carmel Medical Center, Haifa*:** Dmitri Bystritski, Reuven Pizov, Arieh Eden

Italy

***Ospedale San. Paolo Bari, Bari*:** Caterina Valeria Pesce, Annamaria Campanile, Antonella Marrella

***University of Bari “Aldo Moro”, Bari*:** Salvatore Grasso, Michele De Michele

***Institute for Cancer Research and treatment, Candiolo, Turin*:** Francesco Bona, Gianmarco Giacoletto, Elena Sardo

***Azienda Ospedaliera per l’emergenza Cannizzaro, Catania*:** Luigi Giancarlo Vicari Sottosanti

***Ospedale Melegnano, Cernuso, Milano*:** Maurizio Solca

***Azienda Ospedaliera – Universitaria Sant’Anna, Ferrara*:** Carlo Alberto Volta, Savino Spadaro, Marco Verri, Riccardo Ragazzi, Roberto Zoppellari

***Ospedali Riuniti Di Foggia - University of Foggia, Foggia*:** Gilda Cinnella, Pasquale Raimondo, Daniela La Bella, Lucia Mirabella, Davide D'antini

***IRCCS AOU San Martino IST Hospital, University of Genoa, Genoa*:** Paolo Pelosi, Alexandre Molin, Iole Brunetti, Angelo Gratarola, Giulia Pellerano, Rosanna Sileo, Stefano Pezzato, Luca Montagnani

***IRCCS San Raffaele Scientific Institute, Milano*:** Laura Pasin, Giovanni Landoni, Alberto Zangrillo, Luigi Beretta, Ambra Licia Di Parma, Valentina Tarzia, Roberto Dossi, Marta Eugenia Sassone

***Istituto europeo di oncologia – ieo, Milano*:** Daniele Sances, Stefano Tredici, Gianluca Spano, Gianluca Castellani, Luigi Delunas, Sopio Peradze, Marco Venturino

***Ospedale Niguarda Ca'Granda Milano, Milano*:** Ines Arpino, Sara Sher

***Ospedale San Paolo - University of Milano, Milano*:** Concezione Tommasino, Francesca Rapido, Paola Morelli

***University of Naples “Federico II” Naples*:** Maria Vargas, Giuseppe Servillo

***Policlinico "P. Giaccone", Palermo*:** Andrea Cortegiani, Santi Maurizio Raineri, Francesca Montalto, Vincenzo Russotto, Antonino Giarratano

***Azienda Ospedaliero-Universitaria, Parma*:** Marco Baciarello, Michela Generali, Giorgia Cerati

***Santa Maria degli Angeli, Pordenone*:** Yigal Leykin

***Ospedale Misericordia e Dolce - Usl4 Prato, Prato*:** Filippo Bressan, Vittoria Bartolini, Lucia Zamidei

***University hospital of Sassari, Sassari*:** Luca Brazzi, Corrado Liperi, Gabriele Sales, Laura Pistidda

***Insubria University, Varese*:** Paolo Severgnini, Elisa Brugnoni, Giuseppe Musella, Alessandro Bacuzzi

Republic of Kosovo

***Distric hospital Gjakova, Gjakove*:** Dalip Muhardri

***University Clinical Center of Kosova, Prishtina*:** Agreta Gecaj-Gashi, Fatos Sada

***Regional Hospital ”Prim.Dr. Daut Mustafa”, Prizren*:** Adem Bytyqi

Lithuania

***Medical University Hospital, Hospital of Lithuanian University of Health Sciences, Kaunas*:** Aurika Karbonskiene, Ruta Aukstakalniene, Zivile Teberaite, Erika Salciute

***Vilnius University Hospital - Institute of Oncology, Vilnius*:** Renatas Tikuisis, Povilas Miliauskas

***Vilnius University Hospital - Santariskiu Clinics, Vilnius*:** Sipylaite Jurate, Egle Kontrimaviciute, Gabija Tomkute

Malta

***Mater Dei Hospital, Msida*:** John Xuereb, Maureen Bezzina, Francis Joseph Borg

The Netherlands

***Academic Medical Centre, University of Amsterdam*:** Sabrine Hemmes, Marcus Schultz, Markus Hollmann, Irene Wiersma, Jan Binnekade, Lieuwe Bos

***VU University Medical Center, Amsterdam*:** Christa Boer, Anne Duvekot

***MC Haaglanden, Den Haag*:** Bas in ‘t Veld, Alice Werger, Paul Dennesen, Charlotte Severijns

***Westfriesgasthuis, Hoorn*:** Jasper De Jong, Jens Hering, Rienk van Beek

Norway

***Haukeland University Hospital, Bergen*:** Stefan Ivars, Ib Jammer

***Førde Central Hospital /Førde Sentral Sykehus, Førde*:** Alena Breidablik

***Martina Hansens Hospital, Gjettum*:** Katharina Skirstad Hodt, Frode Fjellanger, Manuel Vico Avalos

***Bærum Hospital, Vestre Viken, Rud*:** Jannicke Mellin-Olsen, Elisabeth Andersson

***Stavanger University Hospital, Stavanger*:** Amir Shafi-Kabiri

Panama

***Hospital Santo Tomás, Panama*:** Ruby Molina, Stanley Wutai, Erick Morais

Portugal

***Hospital do Espírito Santo - Évora, E.P.E, Évora.*:** Glória Tareco, Daniel Ferreira, Joana Amaral

***Centro Hospitalar de Lisboa Central, E.P.E, Lisboa.*:** Maria de Lurdes Goncalves Castro, Susana Cadilha, Sofia Appleton

***Centro Hospitalar de Lisboa Ocidental, E.P.E. Hospital de S. Francisco Xavier, Lisboa*:** Suzana Parente, Mariana Correia, Diogo Martins

***Santarem Hospital, Santarem*:** Angela Monteirosa, Ana Ricardo, Sara Rodrigues

Romania

***Spital Orasenesc, Bolintin Vale*:**Lucian Horhota

***Clinical Emergency Hospital of Bucharest, Bucharest*:** Ioana Marina Grintescu, Liliana Mirea, Ioana Cristina Grintescu

***Elias University Emergency Hospital, Bucharest*:** Dan Corneci, Silvius Negoita, Madalina Dutu, Ioana Popescu Garotescu

***Emergency Institute of Cardiovascular Diseases Inst. ''Prof. C. C. Iliescu'', Bucharest*:** Daniela Filipescu, Alexandru Bogdan Prodan

***Fundeni Clinical institute - Anaesthesia and Intensive Care, Bucharest*:** Gabriela Droc, Ruxandra Fota, Mihai Popescu

***Fundeni Clinical institute - Intensive Care Unit, Bucharest*:** Dana Tomescu, Ana Maria Petcu, Marian Irinel Tudoroiu

***Hospital Profesor D Gerota, Bucharest*:** Alida Moise, Catalin-Traian Guran

***Constanta County Emergency Hospital, Constanta*:** Iorel Gherghina, Dan Costea, Iulia Cindea

***University Emergency County Hospital Targu Mures, Targu Mures*:** Sanda-Maria Copotoiu, Ruxandra Copotoiu, Victoria Barsan, Zsolt Tolcser, Magda Riciu, Gheorghe Moldovan Septimiu, Mihaly Veres

Russia

***Krasnoyarsk State Medical University, Krasnoyarsk*:** Alexey Gritsan, Tatyana Kapkan, Galina Gritsan, Oleg Korolkov

***Burdenko Neurosurgery Institute, Moscow*:** Alexander Kulikov, Andrey Lubnin

***Moscow Regional Research Clinical Institute, Moscow*:** Alexey Ovezov, Pavel Prokoshev, Alexander Lugovoy, Natalia Anipchenko

***Municipal Clinical Hospital 7, Moscow*:** Andrey Babayants, Irina Komissarova, Karginova Zalina

***Reanimatology Research Institute n.a. Negovskij RAMS, Moscow*:** Valery Likhvantsev, Sergei Fedorov

Serbia

***Clinical Center of Vojvodina, Emergency Center, Novisad*:** Aleksandra Lazukic, Jasmina Pejakovic, Dunja Mihajlovic

Slovakia

***National Cancer Institute, Bratislava*:** Zuzana Kusnierikova, Maria Zelinkova

***F.D. Roosevelt teaching Hospital, Banská Bystrica*:** Katarina Bruncakova, Lenka Polakovicova

***Faculty Hospital Nové Zámky, Nové Zámky*:** Villiam Sobona

Slovenia

***Institute of Oncology Ljubljana, Ljubljana*:** Barbka Novak-Supe, Ana Pekle-Golez, Miroljub Jovanov, Branka Strazisar

***University Medical Centre Ljubljana, Ljubljana*:** Jasmina Markovic-Bozic, Vesna Novak-Jankovic, Minca Voje, Andriy Grynyuk, Ivan Kostadinov, Alenka Spindler-Vesel

Spain

***Hospital Sant Pau, Barcelona*:** Victoria Moral, Mari Carmen Unzueta, Carlos Puigbo, Josep Fava

***Hospital Universitari Germans Trias I Pujol, Barcelona*:** Jaume Canet, Enrique Moret, Mónica Rodriguez Nunez, Mar Sendra, Andrea Brunelli, Frederic Rodenas

***University of Navarra, Pamplona*:** Pablo Monedero, Francisco Hidalgo Martinez, Maria Jose Yepes Temino, Antonio Martínez Simon, Ana de Abajo Larriba

***Corporacion Sanitaria Parc Tauli, Sabadell*:** Alberto Lisi, Gisela Perez, Raquel Martinez

***Consorcio Hospital General Universitario de Valencia, Valencia*:** Manuel Granell, Jose Tatay Vivo, Cristina Saiz Ruiz, Jose Antonio de Andrés Ibañez

***Hospital Clinico Valencia, Valencia*:** Ernesto Pastor, Marina Soro, Carlos Ferrando, Mario Defez

***Hospital Universitario Rio Hortega, Valladolid*:** Cesar Aldecoa Alvares-Santullano, Rocio Perez, Jesus Rico

Sweden

***Central Hospital in Kristianstad*:** Monir Jawad, Yousif Saeed, Lars Gillberg

Turkey

***Ufuk University Hospital Ankara, Ankara*:** Zuleyha Kazak Bengisun, Baturay Kansu Kazbek

***Akdeniz University Hospital, Antalya*:** Nesil Coskunfirat, Neval Boztug, Suat Sanli, Murat Yilmaz, Necmiye Hadimioglu

***Istanbul University, Istanbul medical faculty, Istanbul*:** Nuzhet Mert Senturk, Emre Camci, Semra Kucukgoncu, Zerrin Sungur, Nukhet Sivrikoz

***Acibadem University, Istanbul*:** Serpil Ustalar Ozgen, Fevzi Toraman

***Maltepe University, Istanbul*:** Onur Selvi, Ozgur Senturk, Mine Yildiz

***Dokuz Eylül Universitesi Tip Fakültesi, Izmir*:** Bahar Kuvaki, Ferim Gunenc, Semih Kucukguclu, Şule Ozbilgin

***Şifa University Hospital, İzmir*:** Jale Maral, Seyda Canli

***Selcuk University faculty of medicine, Konya*:** Oguzhan Arun, Ali Saltali, Eyup Aydogan

***Fatih Sultan Mehmet Eğitim Ve Araştirma Hastanesi, Istanbul*:** Fatma Nur Akgun, Ceren Sanlikarip, Fatma Mine Karaman

Ukraine

***Institute Of Surgery And Transplantology, Kiev*:** Andriy Mazur

***Zaporizhzhia State Medical University, Zaporizhzhia*:** Sergiy Vorotyntsev

United Kingdom

SWARM Research Collaborative: for full list of SWARM contributors please see www.ukswarm.com

***Northern Devon Healthcare NHS Trust, Barnstaple*:** Guy Rousseau, Colin Barrett, Lucia Stancombe

***Golden Jubilee National Hospital, Clydebank, Scotland*:** Ben Shelley, Helen Scholes

***Darlington Memorial Hospital, County Durham and Darlington Foundation NHS Trust, Darlington*:** James Limb, Amir Rafi, Lisa Wayman, Jill Deane

***Royal Derby Hospital, Derby:*** David Rogerson, John Williams, Susan Yates, Elaine Rogers

***Dorset County Hospital, Dorchester*:** Mark Pulletz, Sarah Moreton, Stephanie Jones

***The Princess Alexandra NHS Hospital Trust, Essex*:** Suresh Venkatesh, Maudrian Burton, Lucy Brown, Cait Goodall

***Royal Devon and Exeter NHS Foundation Trust, Exeter*:** Matthew Rucklidge, Debbie Fuller, Maria Nadolski, Sandeep Kusre

***Hospital James Paget University Hospital NHS Foundation Trust, Great Yarmouth*:** Michael Lundberg, Lynn Everett, Helen Nutt

***Royal Surrey County Hospital NHS Foundation Trust, Guildford*:** Maka Zuleika, Peter Carvalho, Deborah Clements, Ben Creagh-Brown

***Kettering General Hospital NHS Foundation Trust, Kettering*:** Philip Watt, Parizade Raymode

***Barts Health NHS Trust, Royal London Hospital, London*:** Rupert Pearse, Otto Mohr, Ashok Raj, Thais Creary

***Newcastle Upon Tyne Hospitals NHS Trust The Freeman Hospital High Heaton, Newcastle upon Tyne*:** Ahmed Chishti, Andrea Bell, Charley Higham, Alistair Cain, Sarah Gibb, Stephen Mowat

***Derriford Hospital Plymouth Hospitals NHS Trust, Plymouth*:** Danielle Franklin, Claire West, Gary Minto, Nicholas Boyd

***Royal Hallamshire Hospital, Sheffield*:** Gary Mills, Emily Calton, Rachel Walker, Felicity Mackenzie, Branwen Ellison, Helen Roberts

***Mid Staffordshire NHS, Stafford*:** Moses Chikungwa, Clare Jackson

***Musgrove Park Hospital, Taunton*:** Andrew Donovan, Jayne Foot, Elizabeth Homan

***South Devon Healthcare NHS Foundation Trust /Torbay Hospital, Torquay, Torbay*:**Jane Montgomery, David Portch, Pauline Mercer, Janet Palme

***Royal Cornwall Hospital, Truro*:** Jonathan Paddle, Anna Fouracres, Amanda Datson, Alyson Andrew, Leanne Welch

***Mid Yorkshire Hospitals NHS Trust; Pinderfields Hospital, Wakefield*:**Alastair Rose, Sandeep Varma, Karen Simeson

***Sandwell and West Birmingham NHS Trust, West Bromich*:** Mrutyunjaya Rambhatla, Jaysimha Susarla, Sudhakar Marri, Krishnan Kodaganallur, Ashok Das, Shivarajan Algarsamy, Julie Colley

***York Teaching Hospitals NHS Foundation Trust, York*:** Simon Davies, Margaret Szewczyk, Thomas Smith

United States

***University of Colorado School of Medicine/University of Colorado Hospital, Aurora*:** Ana Fernandez- Bustamante, Elizabeth Luzier, Angela Almagro

***Massachusetts General Hospital, Boston*:** Marcos Vidal Melo, Luiz Fernando, Demet Sulemanji

***Mayo Clinic, Rochester*:** Juraj Sprung, Toby Weingarten, Daryl Kor, Federica Scavonetto, Yeo Tze
